# Supplementary material for: Blockade of glucagon signaling prevents or reverses diabetes onset only if residual β-cells persist
Source: eLife journal article supplement (doi:10.7554/elife.13828), 2016-04-19
Supplement: supp [file elife-13828-supp-v1.zip]

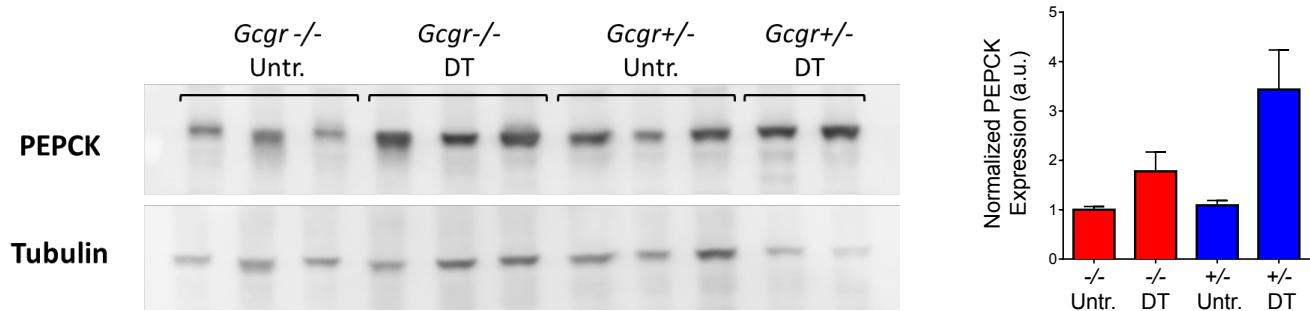

**FIGURE 4 - figure supplement 1. Higher hepatic PEPCK protein expression after DT in both *RIP-DTR-Gcgr*<sup>+/-</sup> and *RIP-DTR-Gcgr*<sup>-/-</sup> mice.**
