# Supplementary material for: Blockade of glucagon signaling prevents or reverses diabetes onset only if residual β-cells persist
Source: eLife journal article supplement (doi:10.7554/elife.13828), 2016-04-19
Supplement: supp [file elife-13828-supp-v1.zip]

Archive with 10 entries (10 files):
- elife_poa_e13828_Figure_4_figure_supplement_3.pdf
- elife_poa_e13828_Figure_5_figure_supplement_1.pdf
- elife_poa_e13828_Figure_2_figure_supplement_1.pdf
- elife_poa_e13828_Figure_6_figure_supplement_1.pdf
- elife_poa_e13828_Figure_2_figure_supplement_2.pdf
- elife_poa_e13828_Figure_3_figure_supplement_2.pdf
- elife_poa_e13828_Figure_1_figure_supplement_1.pdf
- elife_poa_e13828_Figure_3_figure_supplement_1.pdf
- elife_poa_e13828_Figure_4_figure_supplement_2.pdf
- elife_poa_e13828_Figure_4_figure_supplement_1.pdf
