# Supplementary material for: Blockade of glucagon signaling prevents or reverses diabetes onset only if residual β-cells persist
Source: eLife journal article supplement (doi:10.7554/elife.13828), 2016-04-19
Supplement: supp [file elife-13828-supp-v1.zip]

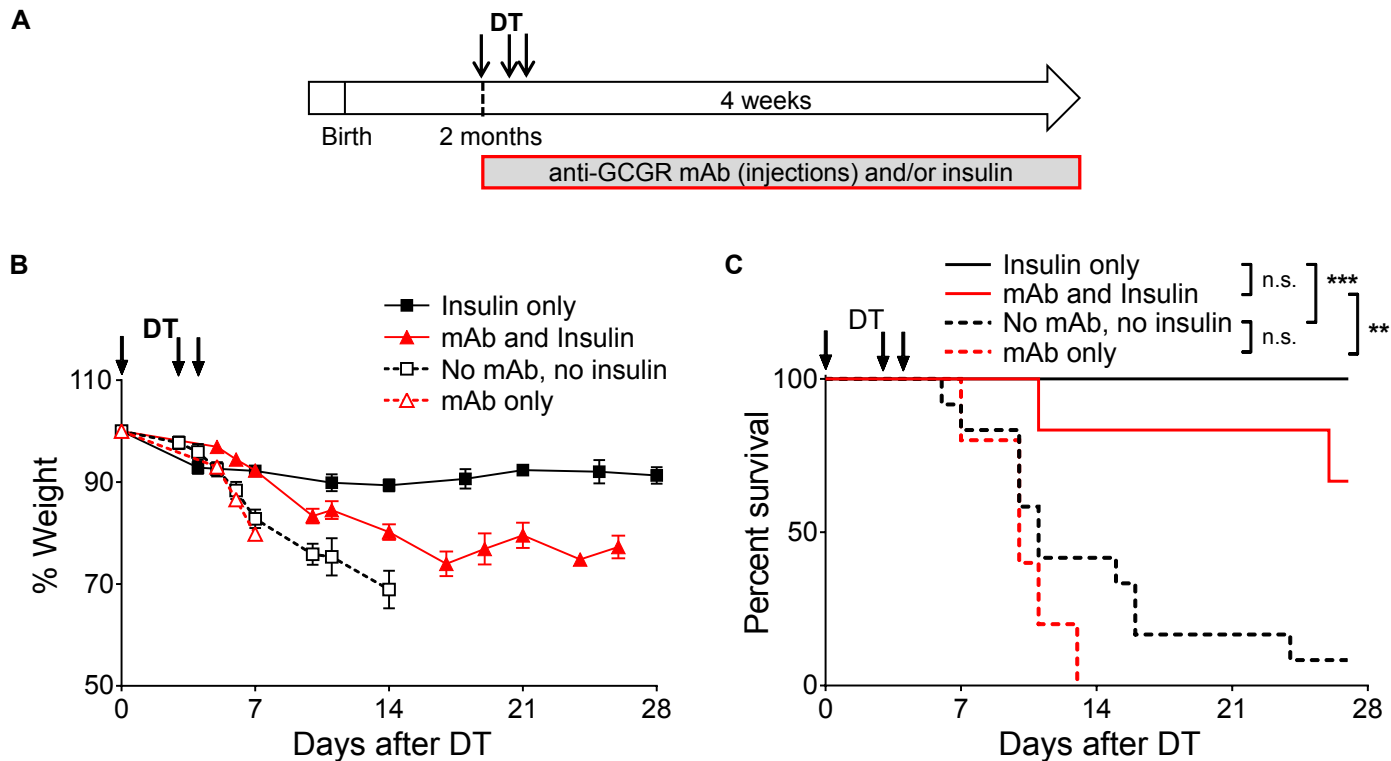

**FIGURE 2 - figure supplement 2. Insulin administration is required to stabilize body weight and allow survival of anti-GCGR-treated mice after DT.**
