# Supplementary material for: Blockade of glucagon signaling prevents or reverses diabetes onset only if residual β-cells persist
Source: eLife journal article supplement (doi:10.7554/elife.13828), 2016-04-19
Supplement: supp [file elife-13828-supp-v1.zip › elife_poa_e13828_Figure_2_figure_supplement_1.pdf]

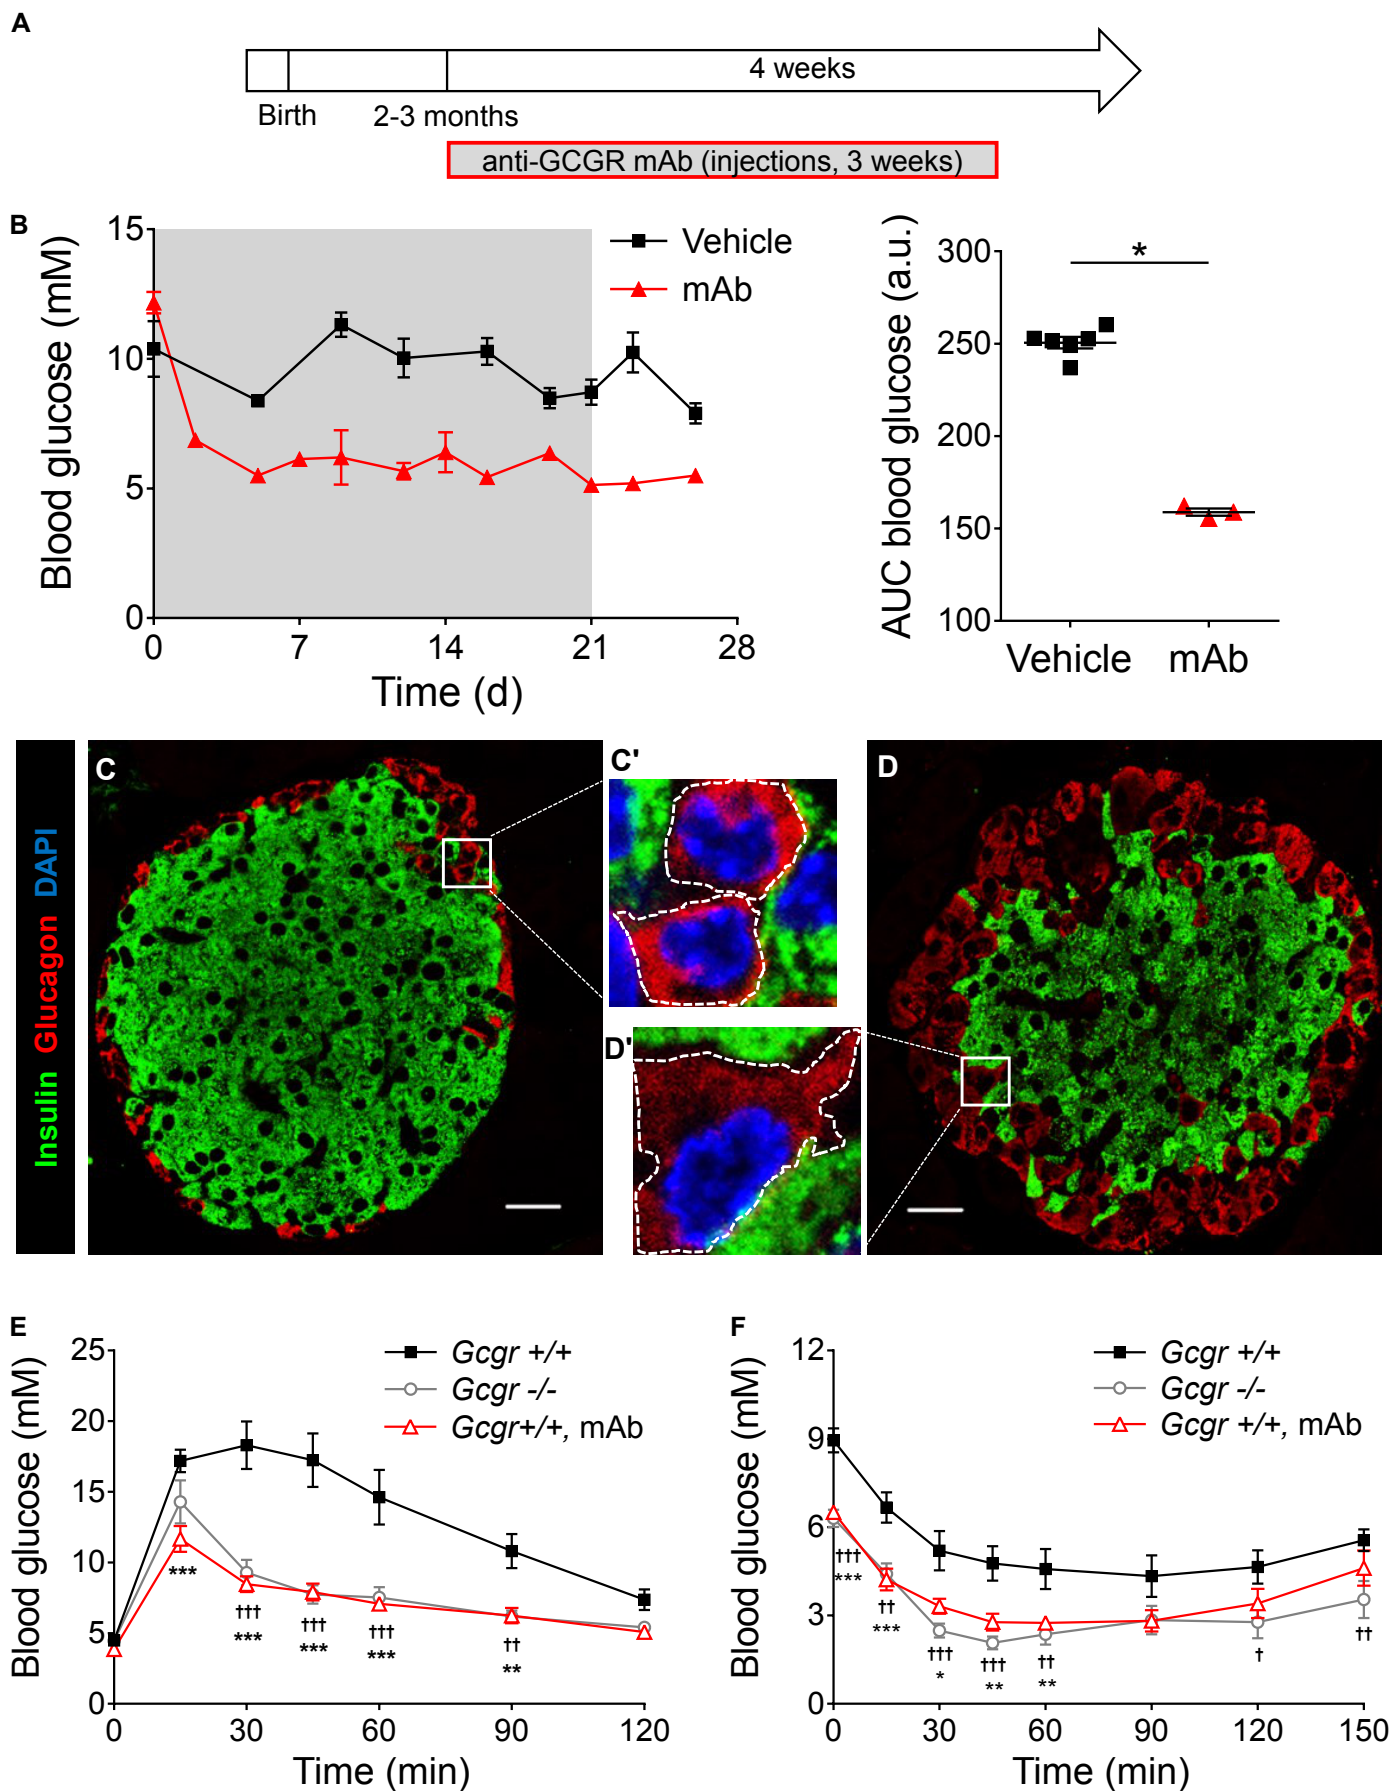

**FIGURE 2 - figure supplement 1. anti-GCGR mAb administration recapitulates the metabolic and cellular phenotypes of  $Gcgr^{-/-}$  mice.**
