# Supplementary material for: Blockade of glucagon signaling prevents or reverses diabetes onset only if residual β-cells persist
Source: eLife journal article supplement (doi:10.7554/elife.13828), 2016-04-19
Supplement: supp [file elife-13828-supp-v1.zip › elife_poa_e13828_Figure_3_figure_supplement_2.pdf]

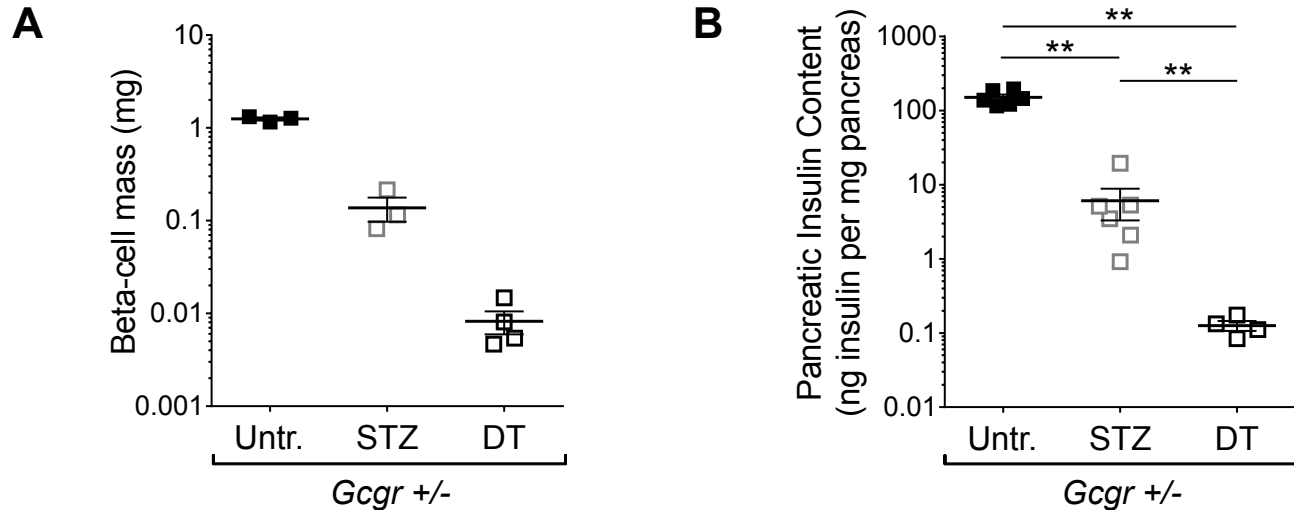

**FIGURE 3 - figure supplement 2. Higher efficiency of  $\beta$ -cell ablation after DT- than after STZ-treatment in mice with normal glucagon signaling**
