# Supplementary material for: Blockade of glucagon signaling prevents or reverses diabetes onset only if residual β-cells persist
Source: eLife journal article supplement (doi:10.7554/elife.13828), 2016-04-19
Supplement: supp [file elife-13828-supp-v1.zip › elife_poa_e13828_Figure_5_figure_supplement_1.pdf]

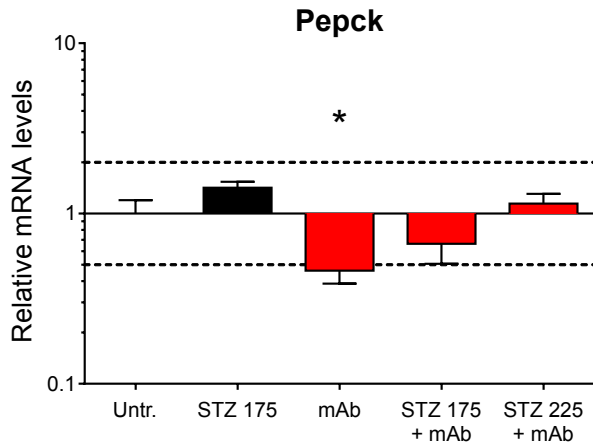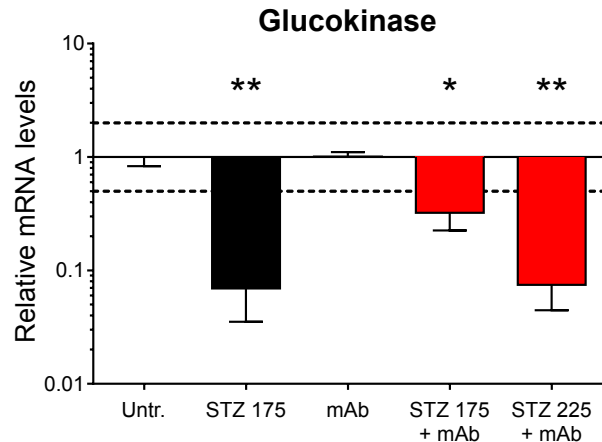

**FIGURE 5 - figure supplement 1. Hepatic Pepck and Glucokinase expression after STZ and/or anti-GCGR mAb treatment.**
